# Supplementary material
Source: publisher site journal article supplement (https://www.spandidos-publications.com/7525/downloadSupplementary)
Supplement: Supplementary file 1 [file downloadSupplementary]

Table SI. Quality evaluation of case-control studies included in the meta-analysis using the Newcastle-Ottawa Scale.

| First author, year              | Selection | Comparability | Exposure | Total quality score | (Refs.) |
|---------------------------------|-----------|---------------|----------|---------------------|---------|
| Han, 2009 Melanoma (NHS)        | ++++      | ++            | ++       | 8                   | (62)    |
| Han, 2009 SCC (NHS)             | ++++      | ++            | ++       | 8                   | (62)    |
| Nan, 2011 Melanoma (WHI-OS)     | ++++      | +             | ++       | 7                   | (63)    |
| Nan, 2011 Melanoma (HPFS)       | ++++      | +             | ++       | 7                   | (63)    |
| Liang et al. 2011 SCC (HPFS)    | ++++      | +             | ++       | 7                   | (75)    |
| Liang, 2011 BCC (NHS 1)         | ++++      | +             | ++       | 7                   | (75)    |
| Liang, 2011 BCC (NHS 2)         | ++++      | +             | ++       | 7                   | (75)    |
| Bodelon, 2012 Melanoma          | +++       | ++            | ++       | 7                   | (69)    |
| Anic, 2013 Melanoma             | ++++      | +             | ++       | 7                   | (66)    |
| Anic, 2013 SCC                  | ++++      | +             | ++       | 7                   | (66)    |
| Anic, 2013 BCC                  | ++++      | +             | ++       | 7                   | (66)    |
| Burke, 2013 Melanoma            | ++++      | ++            | ++       | 8                   | (72)    |
| Llorca-Cardeñosa, 2014 Melanoma | ++++      | +             | ++       | 7                   | (70)    |
| Menin, 2016 FM                  | ++++      | +             | ++       | 7                   |         |
| Menin, 2016 SM                  | ++++      | +             | ++       | 7                   | (71)    |
| Rachakonda, 2018 Melanoma       | ++++      | ++            | ++       | 8                   | (67)    |
| Srinivas, 2019 BCC              | ++++      | ++            | ++       | 8                   | (74)    |

BCC, basal cell carcinoma; SCC, squamous cell carcinoma; NHS, Nurses' Health Study; WHI-OS, Women's Health Initiative Observational Study; HPFS, Health Professionals Follow-up Study.

Table SII. Quality evaluation of case-control studies included in the systematic review but not in the meta-analysis using the Newcastle-Ottawa Scale.

| First author, year     | Selection | Comparability | Exposure | Total quality score | (Refs.) |
|------------------------|-----------|---------------|----------|---------------------|---------|
| Wainwright, 1995       | + + +     | +             | ++       | 6                   | (76)    |
| Perrem, 2007 RTR       | + +       | +             | ++       | 5                   | (77)    |
| Perrem, 2007           | + +       | +             | ++       | 5                   | (77)    |
| Perrem et al. 2008 RTR | + +       | +             | ++       | 5                   | (73)    |
| Perrem, 2008           | + +       | +             | ++       | 5                   | (73)    |

RTR, renal transplant recipient.

Table SIII. Quality evaluation of cohort studies included in the meta-analysis using the Newcastle-Ottawa Scale.

| First author, year          | Selection | Comparability | Exposure | Total Quality Score | (Refs.) |
|-----------------------------|-----------|---------------|----------|---------------------|---------|
| Rode, 2016<br>Melanoma      | ++++      | +             | +++      | 8                   | (50)    |
| Schneider, 2022<br>Melanoma | +++       | +             | +++      | 7                   | (68)    |
